# Supplementary material
Source: Springer Nature journal article supplement (https://mijn.bsl.nl/resource/supplementary/13047_2010_142_MOESM3_ESM.pdf/7110072)

○ Rater A  
○ Rater B

Differences of session 1 and 2

20  
0  
-20  
-40

50 75 100 125 150

Mean score of session 1 and 2 (mmHg)

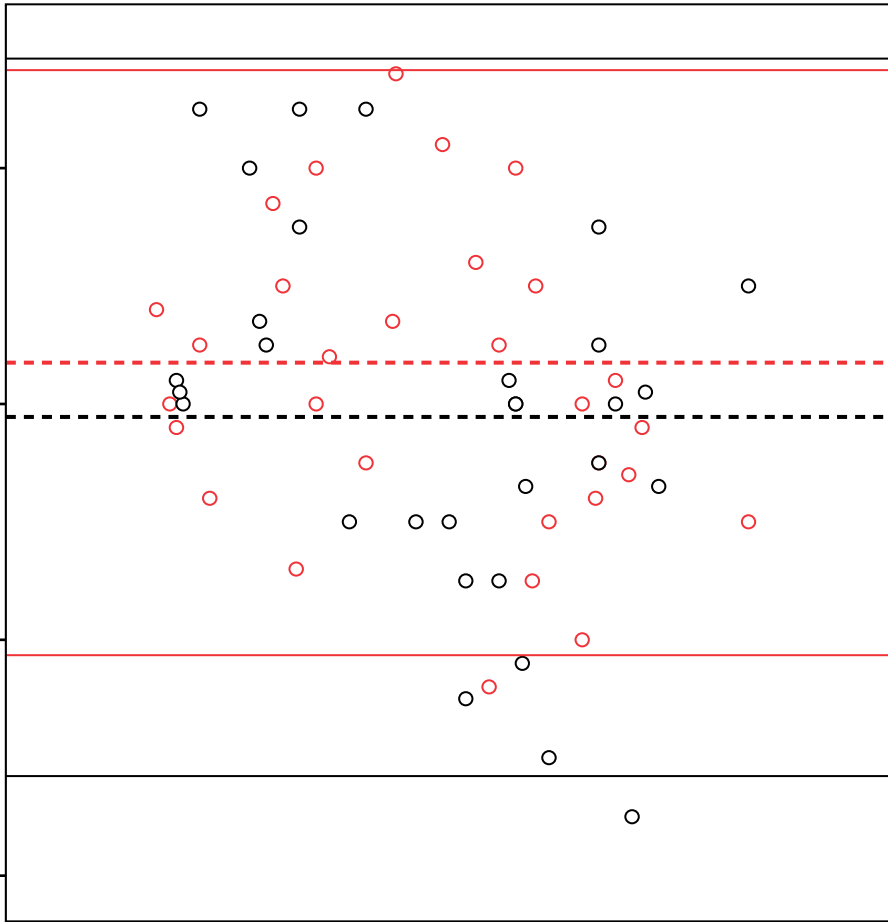

Supplement: MOESM3 [file 7110072]
